# Supplementary material for: Comparative genomic analysis of emerging non-typeable Haemophilus influenzae (NTHi) causing emerging septic arthritis in Atlanta
Source: PeerJ. 2025 Mar 21;13:e19081. doi: 10.7717/peerj.19081 (PMC11932112; doi:10.7717/peerj.19081)
Supplement: Supplemental Information 6 — The homoplasy consistency index calculation for all 8 gained gene families and the one lost gene family from the pangenome analysis. [file peerj-13-19081-s006.xlsx]

## Sheet: Sheet1
gene_name	gene_product	ID	consistency_Index
pxpB	5-oxoprolinase subunit PxpB(495):divalent metal cation transporter(465)	lost	0.142857
NA	UTRA domain-containing protein(95)	gained	0.142857
malQ	4-alpha-glucanotransferase(95)	gained	0.142857
NA	endonuclease/exonuclease/phosphatase family protein(95)	gained	0.142857
NA	PTS transporter subunit EIIC(95)	gained	0.142857
tnpA	IS200/IS605 family transposase(92)	gained	0.142857
NA	hypothetical protein(76)	gained	0.111111
NA	hypothetical protein(74)	gained	0.111111
NA	hypothetical protein(72)	gained	0.2
